# Supplementary material for: Fabrication of urchin-like NiCo2(CO3)1.5(OH)3@NiCo2S4 on Ni foam by an ion-exchange route and application to asymmetrical supercapacitors
Source: Royal Society of Chemistry journal article supplement (doi:10.1039/c5ta02684a), 2015-01-01
Supplement: c5ta02684a1.pdf [file c5ta02684a1.pdf]

## **Electronic Supporting Information**

### **Fabrication of urchin-like $\text{NiCo}_2(\text{CO}_3)_{1.5}(\text{OH})_3@ \text{NiCo}_2\text{S}_4$ on the Ni foam by ion exchange route and applying to asymmetric supercapacitor**

Bin Yang, Lei Yu, Huijun Yan, Yanbo Sun, Qi Liu, Jingyuan Liu, Dalei Song, Songxia Hu, Yi Yuan,  
Lianhe Liu, Jun Wang

Key Laboratory of Superlight Material and Surface Technology, Ministry of Education, Harbin  
Engineering University, 150001, P. R. China

\*E-mail address: zhqw1888@sohu.com.

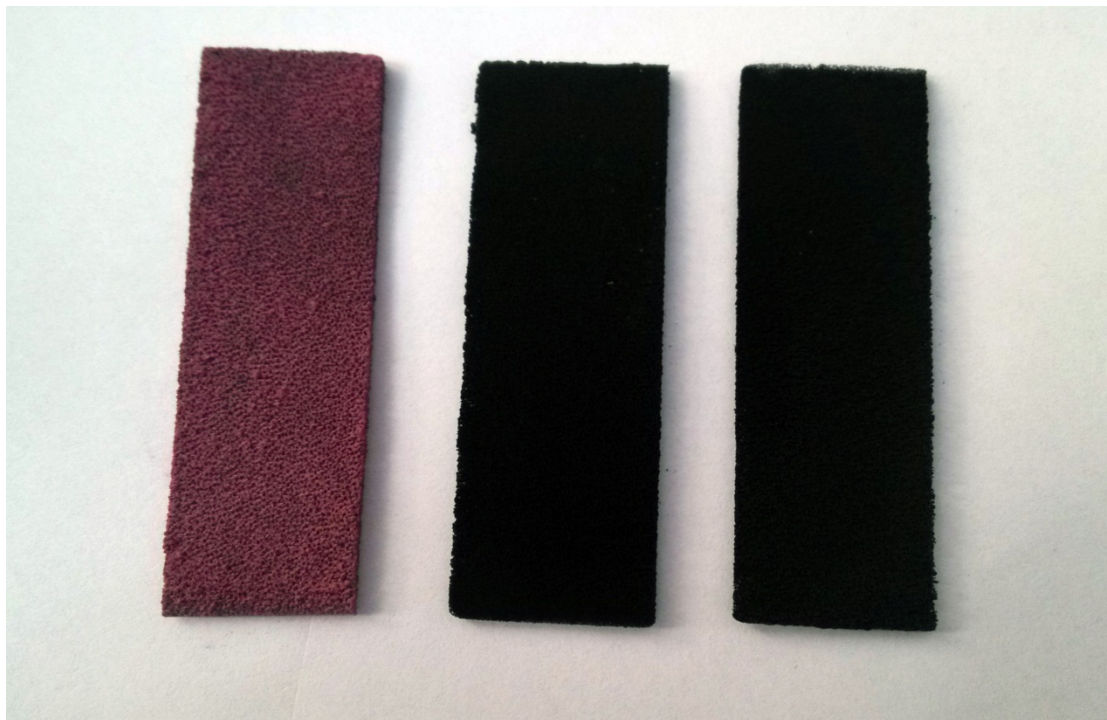

Fig. S1 the photography of urchin-like  $\text{NiCo}_2(\text{CO}_3)_{1.5}(\text{OH})_3$  (left),  $\text{NiCo}_2\text{S}_4$  (middle) and  $\text{NiCo}_2(\text{CO}_3)_{1.5}(\text{OH})_3@ \text{NiCo}_2\text{S}_4$  (right).

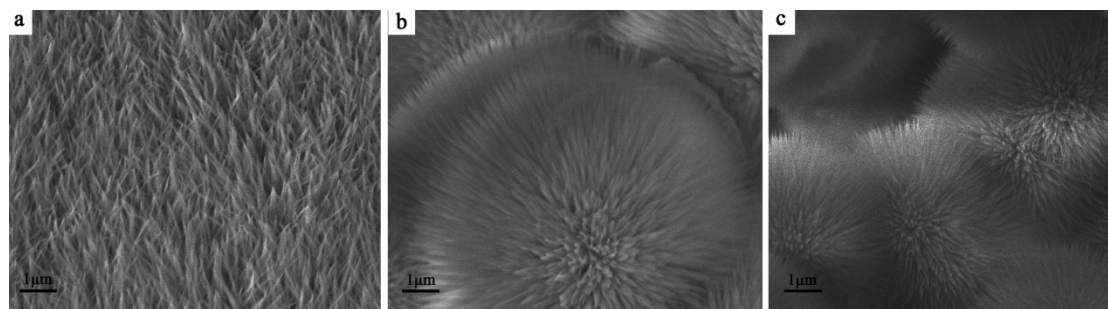

Fig. S2 the SEM images of  $\text{NiCo}_2(\text{CO}_3)_{1.5}(\text{OH})_3$  nanowires (a), urchin-like  $\text{NiCo}_2(\text{CO}_3)_{1.5}(\text{OH})_3$  (b) and urchin-like  $\text{NiCo}_2\text{S}_4$  (c).

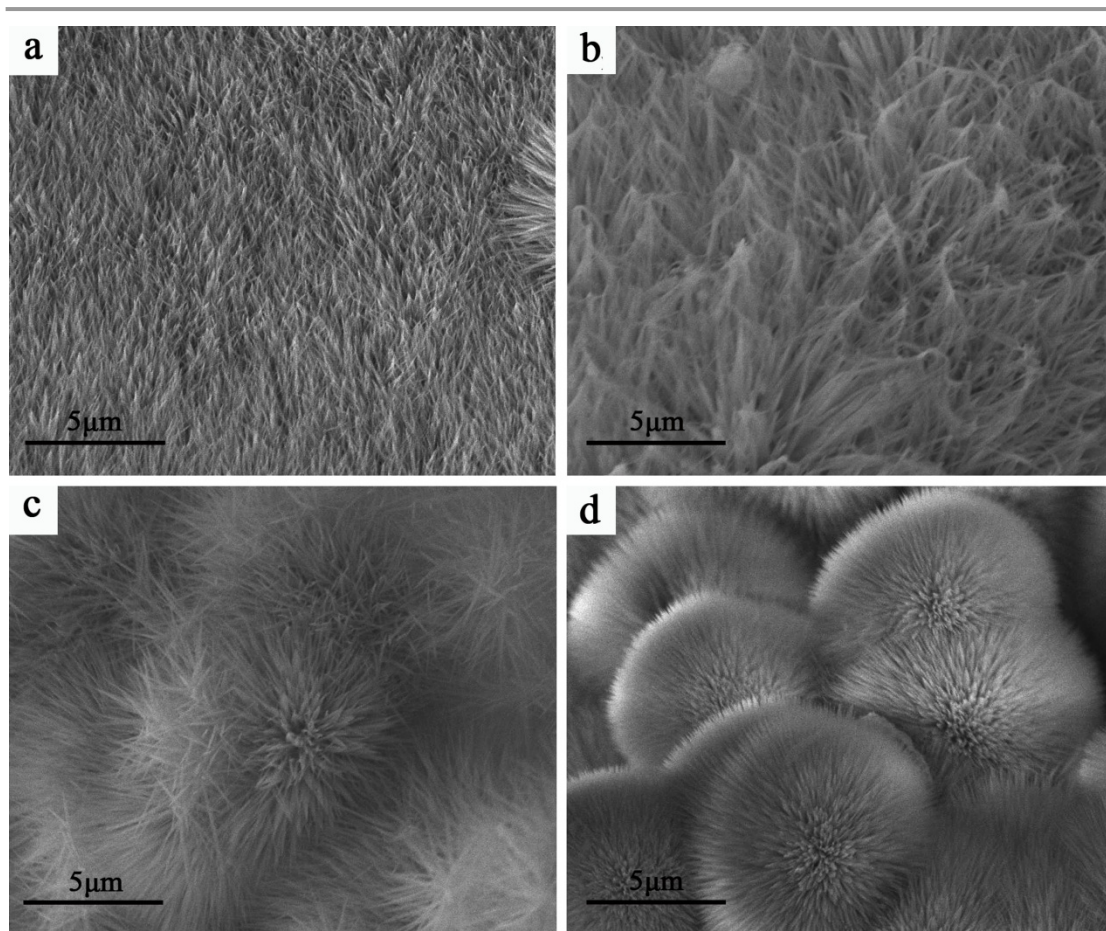

Fig. S3. the SEM images of the precursors at different reaction time, (a) 12h, (b) 16h, (c) 20h, (d) 24h,

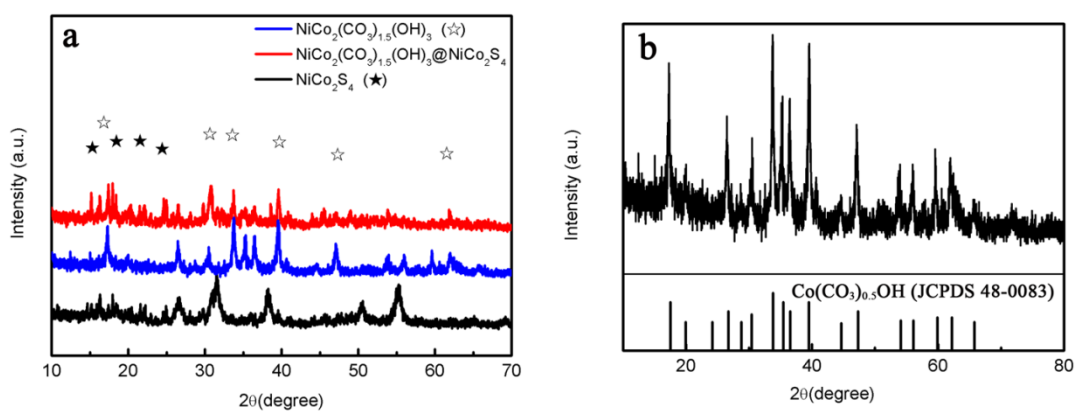

Fig. S4 (a) XRD patterns of  $\text{NiCo}_2(\text{CO}_3)_{1.5}(\text{OH})_3$ ,  $\text{NiCo}_2\text{S}_4$  and  $\text{NiCo}_2(\text{CO}_3)_{1.5}(\text{OH})_3@$  $\text{NiCo}_2\text{S}_4$ , (b) XRD patterns of  $\text{NiCo}_2(\text{CO}_3)_{1.5}(\text{OH})_3$ .

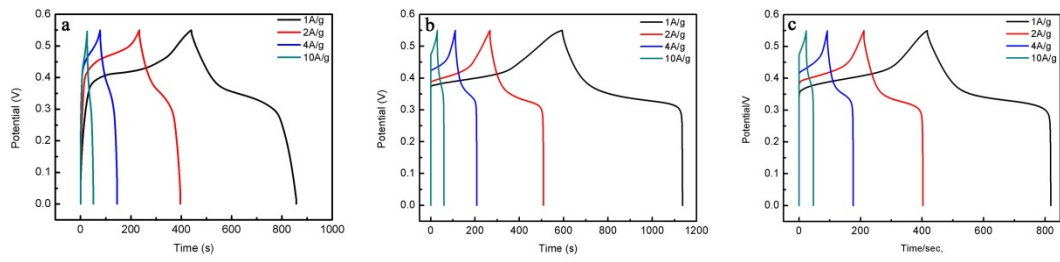

Fig. S5. The GCD curves of different electrode at current density of 1, 2, 4, 10 A g<sup>-1</sup>. (a) urchin-like NiCo<sub>2</sub>(CO<sub>3</sub>)<sub>1.5</sub>(OH)<sub>3</sub>, (b) urchin-like NiCo<sub>2</sub>S<sub>4</sub> (c) NiCo<sub>2</sub>(CO<sub>3</sub>)<sub>1.5</sub>(OH)<sub>3</sub> @NiCo<sub>2</sub>S<sub>4</sub> nanowires.

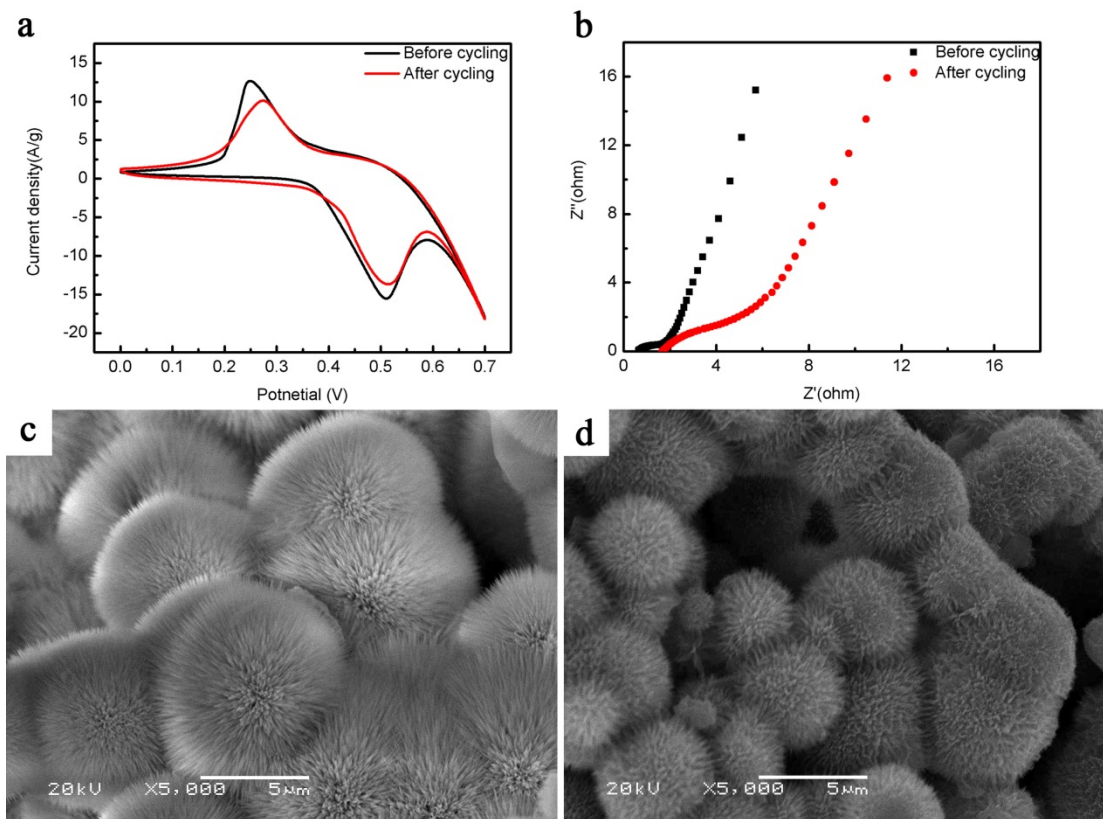

Fig. S6 (a) the CV curves of before and after cycling, (b) the EIS plots of before and after cycling (c) the SEM image of before cycling, (d) the SEM image of after cycling.

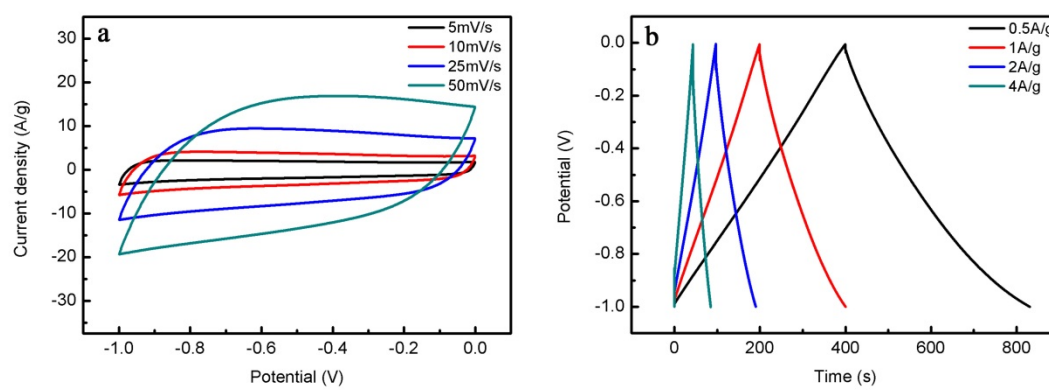

Figure S7. (a) CV curves of AC electrode at different scan rate, (b) charge-discharge curves of AC electrode at different current densities.



**Table S1.** Comparison of the maximum energy densities, corresponding average power densities and voltage range of the reported nickel, cobalt or bimetal oxide/hydroxide/sulfides based asymmetric supercapacitors and the present work.

| Positive materials//negative materials                                                                       | Energy density<br>(W h kg <sup>-1</sup> ) | Power density<br>(W kg <sup>-1</sup> ) | Voltage range | Ref.      |
|--------------------------------------------------------------------------------------------------------------|-------------------------------------------|----------------------------------------|---------------|-----------|
| Nickel cobalt LDHs//AC                                                                                       | 23.7                                      | 280                                    | 0-1.2         | [1]       |
| NiCo <sub>2</sub> S <sub>4</sub> //RGO                                                                       | 31.5                                      | 156.6                                  | 0-1.6         | [2]       |
| Co <sub>0.45</sub> Ni <sub>0.55</sub> O-RGO//RGO                                                             | 35.3                                      | 330                                    | 0-1.5         | [3]       |
| Ni <sub>3</sub> S <sub>2</sub> /MWCNT-NC//AC                                                                 | 19.8                                      | 798                                    | 0-1.6         | [4]       |
| NiCo <sub>2</sub> O <sub>4</sub> -CQDs//AC                                                                   | 27.8                                      | 128                                    | 0-1.5         | [5]       |
| CoS <sub>x</sub> -NSA//rGO                                                                                   | 14.68                                     | 369                                    | 0-1.55        | [6]       |
| Ni(OH) <sub>2</sub> @3D Ni//AC                                                                               | 21.8                                      | 660                                    | 0-1.3         | [7]       |
| CoO@PPy//AC                                                                                                  | 43.5                                      | 87.5                                   | 0-1.8         | [8]       |
| Co <sub>3</sub> O <sub>4</sub> //AC                                                                          | 34                                        | 225                                    | 0-1.5         | [9]       |
| Ni(OH) <sub>2</sub> //AC                                                                                     | 35.7                                      | 490                                    | 0-1.3         | [10]      |
| NiCo <sub>2</sub> O <sub>4</sub> @MnO <sub>2</sub> //AC                                                      | 35                                        | 163                                    | 0-1.5         | [11]      |
| NiCo <sub>2</sub> (CO <sub>3</sub> ) <sub>1.5</sub> (OH) <sub>3</sub> @NiCo <sub>2</sub> S <sub>4</sub> //AC | 42.55                                     | 458.8                                  | 0-1.6         | This work |

### References for supporting information:

1. X. Wang, A. Sumboja, M. Lin, J. Yan, P. S. Lee, *Nanoscale* **2012**, *4*, 7266.
2. H. Chen, J. Jiang, L. Zhang, D. Xia, Y. Zhao, D. Guo, T. Qi and H. Wan, *J. Power Sources*, 2014, *254*, 249-257.
3. J. Xiao, S. Yang, *J. Mater. Chem.* **2012**, *22*, 12253.
4. C. S. Dai, P. Y. Chien, J. Y. Lin, S. W. Chou, W. K. Wu, P. H. Li, K. Y. Wu and T. W. Lin, *ACS Appl. Mater. Inter.*, 2013, *5*, 12168-12174.
5. Y. R. Zhu, Z. B. Wu, M. J. Jing, H. S. Hou, Y. C. Yang, Y. Zhang, X. M. Yang, W. X. Song, X. N. Jia and X. B. Ji, *J. Mater. Chem. A*, 2015, *3*, 866-877.
6. D. P. Dubal, G. S. Gungor, C. D. Lokhande and R. Holze, *Energy Technology*, 2014, *2*, 401-408.

7. Y.-Z. Su, K. Xiao, N. Li, Z.-Q. Liu and S.-Z. Qiao, *J. Mater. Chem. A*, 2014, 2, 13845-13853.
8. C. Zhou, Y. Zhang, Y. Li and J. Liu, *Nano Lett.*, 2013, 13, 2078-2085.
9. X. Zhang, Y. Q. Zhao and C. L. Xu, *Nanoscale*, 2014, 6, 3638-3646.
10. H. B. Li, M. H. Yu, F. X. Wang, P. Liu, Y. Liang, J. Xiao, C. X. Wang, Y. X. Tong and G. W. Yang, *Nat. commun.*, 2013, 4.
11. K. Xu, W. Li, Q. Liu, B. Li, X. Liu, L. An, Z. Chen, R. Zou and J. Hu, *J. Mater. Chem. A*, 2014, 2, 4795-4802.
